# Supplementary material for: Wine lees modulate lipid metabolism and induce fatty acid remodelling in zebrafish
Source: Royal Society of Chemistry journal article supplement (doi:10.1039/c6fo01754a), 2017-01-01
Supplement: c6fo01754a1.pdf [file c6fo01754a1.pdf]

Zebrafish embryos' lipid profile at 5 dpf after treatment with DMSO (1%), lees (1:10,000) and resveratrol (100µM). Relative % (±SD) is displayed. \*  $p < 0.05$  respect to DMSO treated group.

| FAME       |            | PL           |               |              |               |               |               |
|------------|------------|--------------|---------------|--------------|---------------|---------------|---------------|
|            |            | DMSO         |               | Lees         |               | Resveratrol   |               |
| SFA        | 14:0       | 0.29         | ± 0.02        | 0.18*        | ± 0.00        | 0.17*         | ± 0.02        |
|            | 16:0       | 27.56        | ± 0.28        | 27.03        | ± 0.32        | 26.92         | ± 0.30        |
|            | 18:0       | 10.57        | ± 0.23        | 11.21*       | ± 0.20        | 10.43         | ± 0.10        |
|            | 20:0       | 0.06         | ± 0.03        | 0.27*        | ± 0.03        | 0.18*         | ± 0.04        |
|            | 22:0       | 0.03         | ± 0.00        | 0.03*        | ± 0.00        | 0.04          | ± 0.02        |
| Total SFA  |            | <b>38.52</b> | ± <b>0.39</b> | <b>38.72</b> | ± <b>0.49</b> | <b>37.75</b>  | ± <b>0.43</b> |
| MUFA       | 16:1 ω10   | 0.37         | ± 0.01        | 0.30*        | ± 0.01        | 0.30*         | ± 0.02        |
|            | 16:1 ω7    | 0.53         | ± 0.03        | 0.43*        | ± 0.01        | 0.44*         | ± 0.01        |
|            | 18:1 ω9    | 12.12        | ± 0.19        | 12.45        | ± 0.09        | 13.02*        | ± 0.32        |
|            | 18:1 ω7    | 1.80         | ± 0.03        | 1.81         | ± 0.03        | 1.83          | ± 0.09        |
| Total MUFA |            | <b>14.82</b> | ± <b>0.26</b> | <b>14.99</b> | ± <b>0.05</b> | <b>15.60*</b> | ± <b>0.24</b> |
| PUFA w6    | 18:2 ω6    | 6.65         | ± 0.15        | 6.47         | ± 0.83        | 6.74          | ± 0.88        |
|            | 20:3 ω6    | 0.88         | ± 0.04        | 0.57*        | ± 0.05        | 0.55*         | ± 0.04        |
|            | 20:4 ω6    | 2.59         | ± 0.04        | 2.82*        | ± 0.07        | 2.74          | ± 0.11        |
|            | 22:5 ω6    | 1.44         | ± 0.06        | 1.63*        | ± 0.00        | 1.64*         | ± 0.06        |
| PUFA w3    | 20:5 ω3    | 4.77         | ± 0.04        | 5.31*        | ± 0.30        | 5.21          | ± 0.31        |
|            | 22:6 ω3    | 29.45        | ± 0.69        | 28.84        | ± 0.45        | 29.21         | ± 0.35        |
| Total PUFA |            | <b>45.79</b> | ± <b>0.60</b> | <b>45.65</b> | ± <b>0.57</b> | <b>46.09</b>  | ± <b>0.64</b> |
| TFA        | 16:1 ω10 t | 0.45         | ± 0.01        | 0.31*        | ± 0.01        | 0.28*         | ± 0.02        |
|            | 16:1 ω7 t  | 0.05         | ± 0.00        | 0.03*        | ± 0.00        | 0.02*         | ± 0.00        |
|            | 18:1 ω9 t  | 0.18         | ± 0.01        | 0.11*        | ± 0.01        | 0.10*         | ± 0.02        |
|            | 18:2 mt    | 0.03         | ± 0.01        | 0.04         | ± 0.00        | 0.05          | ± 0.01        |
|            | 20:4 mt    | 0.01         | ± 0.00        | 0.02*        | ± 0.00        | 0.01          | ± 0.00        |
|            | 20:5 mt    | 0.06         | ± 0.01        | 0.07         | ± 0.02        | 0.04          | ± 0.02        |
|            | 22:6 mt    | 0.10         | ± 0.03        | 0.08         | ± 0.01        | 0.06          | ± 0.01        |
| Total TFA  |            | <b>0.88</b>  | ± <b>0.05</b> | <b>0.64*</b> | ± <b>0.03</b> | <b>0.56*</b>  | ± <b>0.04</b> |

|                   |            | TG           |   |             |              |   |             |              |   |             |             |  |  |
|-------------------|------------|--------------|---|-------------|--------------|---|-------------|--------------|---|-------------|-------------|--|--|
|                   |            | FAME         |   |             | DMSO         |   |             | Lees         |   |             | Resveratrol |  |  |
| SFA               | 14:0       | 0.86         | ± | 0.07        | 0.61         | ± | 0.30        | 0.42*        | ± | 0.07        |             |  |  |
|                   | 16:0       | 25.41        | ± | 0.92        | 23.35        | ± | 3.43        | 24.18        | ± | 1.42        |             |  |  |
|                   | 18:0       | 8.02         | ± | 1.53        | 5.83         | ± | 0.56        | 8.40         | ± | 0.66        |             |  |  |
|                   | 20:0       | 0.31         | ± | 0.08        | 0.38         | ± | 0.13        | 0.43         | ± | 0.23        |             |  |  |
|                   | 22:0       | 0.13         | ± | 0.08        | 0.05         | ± | 0.00        | 0.14         | ± | 0.06        |             |  |  |
| <b>Total SFA</b>  |            | <b>34.74</b> | ± | <b>2.26</b> | <b>30.22</b> | ± | <b>4.16</b> | <b>33.56</b> | ± | <b>1.98</b> |             |  |  |
| MUFA              | 16:1 ω10   | 0.57         | ± | 0.03        | 0.45         | ± | 0.09        | 0.43*        | ± | 0.02        |             |  |  |
|                   | 16:1 ω7    | 1.70         | ± | 0.12        | 1.45         | ± | 0.09        | 1.32*        | ± | 0.08        |             |  |  |
|                   | 18:1 ω9    | 14.16        | ± | 0.85        | 12.39        | ± | 0.83        | 15.82        | ± | 0.80        |             |  |  |
|                   | 18:1 ω7    | 3.22         | ± | 0.15        | 2.85         | ± | 0.18        | 3.35         | ± | 0.17        |             |  |  |
| <b>Total MUFA</b> |            | <b>19.65</b> | ± | <b>0.95</b> | <b>17.14</b> | ± | <b>1.20</b> | <b>20.93</b> | ± | <b>1.03</b> |             |  |  |
| PUFA w6           | 18:2 ω6    | 15.59        | ± | 0.57        | 15.96        | ± | 2.18        | 14.67        | ± | 0.67        |             |  |  |
|                   | 20:3 ω6    | 1.14         | ± | 0.03        | 0.77*        | ± | 0.03        | 0.77*        | ± | 0.14        |             |  |  |
|                   | 20:4 ω6    | 1.75         | ± | 0.06        | 2.08*        | ± | 0.04        | 2.08         | ± | 0.26        |             |  |  |
|                   | 22:5 ω6    | 1.55         | ± | 0.17        | 2.24*        | ± | 0.28        | 2.00         | ± | 0.41        |             |  |  |
| PUFA w3           | 20:5 ω3    | 6.03         | ± | 0.83        | 9.26*        | ± | 1.11        | 7.05         | ± | 0.89        |             |  |  |
|                   | 22:6 ω3    | 17.89        | ± | 1.63        | 21.31        | ± | 1.79        | 17.79        | ± | 2.32        |             |  |  |
| <b>Total PUFA</b> |            | <b>43.95</b> | ± | <b>3.16</b> | <b>51.62</b> | ± | <b>5.36</b> | <b>44.35</b> | ± | <b>3.35</b> |             |  |  |
| TFA               | 16:1 ω10 t | 0.63         | ± | 0.03        | 0.48*        | ± | 0.01        | 0.57         | ± | 0.16        |             |  |  |
|                   | 16:1 ω7 t  | 0.05         | ± | 0.00        | 0.04         | ± | 0.01        | 0.03*        | ± | 0.01        |             |  |  |
|                   | 18:1 ω9 t  | 0.27         | ± | 0.03        | 0.16*        | ± | 0.02        | 0.19*        | ± | 0.00        |             |  |  |
|                   | 18:2 mt    | 0.07         | ± | 0.00        | 0.08         | ± | 0.02        | 0.10         | ± | 0.07        |             |  |  |
|                   | 20:4 mt    | 0.02         | ± | 0.00        | 0.02         | ± | 0.00        | 0.02         | ± | 0.00        |             |  |  |
|                   | 20:5 mt    | 0.11         | ± | 0.03        | 0.12         | ± | 0.01        | 0.07         | ± | 0.06        |             |  |  |
|                   | 22:6 mt    | 0.51         | ± | 0.04        | 0.12*        | ± | 0.03        | 0.19*        | ± | 0.15        |             |  |  |
| <b>Total TFA</b>  |            | <b>1.66</b>  | ± | <b>0.09</b> | <b>1.02*</b> | ± | <b>0.00</b> | <b>1.16</b>  | ± | <b>0.33</b> |             |  |  |
